# Supplementary material for: Involvement of Palliative Care in Malignant Pleural Mesothelioma Patients and Associations with Survival and End-of-Life Outcomes
Source: MDPI journal article supplement (doi:10.3390/curroncol31020076), 2024-02-14
Supplement: s1 [file s1]

## Supplementary data

**Table S1:** Number of hospital admissions and Emergency Room (ER) visits, by palliative care status.

| <b>Hospital admissions</b> |    | <b>Non-palliative group</b> | <b>Palliative group</b> |
|----------------------------|----|-----------------------------|-------------------------|
|                            |    | % patients (n)              | % patients (n)          |
|                            | 0  | 50.5 (49)                   | 40.4 (21)               |
|                            | 1  | 25.8 (25)                   | 32.7 (17)               |
|                            | 2  | 12.4 (12)                   | 21.2 (11)               |
|                            | 3  | 5.2 (5)                     | 3.8 (2)                 |
|                            | 4+ | 6.2 (6)                     | 1.9 (1)                 |
| <b>ER visits</b>           |    |                             |                         |
|                            | 0  | 47.2 (34)                   | 21.2 (7)                |
|                            | 1  | 27.8 (20)                   | 21.2 (7)                |
|                            | 2  | 9.7 (7)                     | 21.2 (7)                |
|                            | 3  | 2.8 (2)                     | 15.2 (5)                |
|                            | 4+ | 12.5 (9)                    | 21.2 (7)                |

**Table S2:** Regression analysis of Emergency Visits

| <i>Predictors</i>       | <i>Estimates</i> | <i>CI</i>    | <i>p</i> |
|-------------------------|------------------|--------------|----------|
| (Intercept)             | 3.04             | -1.38 – 7.45 | 0.175    |
| Palliative care         | 1.16             | 0.25 – 2.06  | 0.013    |
| Age at diagnosis        | -0.01            | -0.07 – 0.04 | 0.626    |
| Male sex                | -0.17            | -1.33 – 1.00 | 0.777    |
| Smoker                  | -0.38            | -1.30 – 0.53 | 0.405    |
| Asbestos Exposure       | -0.4             | -1.31 – 0.50 | 0.377    |
| ECOG 1                  | -0.36            | -1.50 – 0.77 | 0.523    |
| ECOG 2                  | -0.64            | -2.03 – 0.74 | 0.359    |
| ECOG 3                  | -0.05            | -1.86 – 1.76 | 0.957    |
| ECOG 4                  | -2.54            | -6.83 – 1.75 | 0.242    |
| Stage II                | 0.75             | -0.71 – 2.21 | 0.311    |
| Stage III               | 0.03             | -1.02 – 1.08 | 0.955    |
| Stage IV                | -0.09            | -1.23 – 1.06 | 0.881    |
| Biphasic histology      | -1.18            | -2.52 – 0.15 | 0.081    |
| Unknown/other histology | -0.08            | -1.22 – 1.06 | 0.886    |
| Sarcomatoid histology   | -0.08            | -1.30 – 1.13 | 0.893    |
| EPP                     | 0.14             | -1.37 – 1.64 | 0.856    |
| Radiation therapy       | 0.31             | -0.57 – 1.19 | 0.482    |
| Chemotherapy            | -0.04            | -1.07 – 0.99 | 0.933    |

$R^2$  /  $R^2$  adjusted      0.209 / 0.019

ECOG: Eastern Cooperative Oncology Group; EPP = extrapleural pneumonectomy

**Table S3:** Regression analysis of hospital visits

| <i>Predictors</i>       | <i>Estimates</i> | <i>CI</i>    | <i>p</i> |
|-------------------------|------------------|--------------|----------|
| (Intercept)             | 1.19             | -0.94 – 3.32 | 0.272    |
| Palliative care         | 0.38             | -0.08 – 0.83 | 0.108    |
| Age at diagnosis        | 0                | -0.03 – 0.02 | 0.774    |
| Male sex                | -0.13            | -0.69 – 0.44 | 0.659    |
| Smoker                  | -0.3             | -0.76 – 0.17 | 0.214    |
| Asbestos Exposure       | -0.24            | -0.69 – 0.21 | 0.294    |
| ECOG 1                  | 0.01             | -0.58 – 0.61 | 0.969    |
| ECOG 2                  | 0.34             | -0.36 – 1.05 | 0.337    |
| ECOG 3                  | 0.11             | -0.79 – 1.02 | 0.806    |
| ECOG 4                  | -0.19            | -1.53 – 1.14 | 0.777    |
| Stage II                | 0.24             | -0.52 – 1.01 | 0.525    |
| Stage III               | 0.11             | -0.44 – 0.67 | 0.683    |
| Stage IV                | -0.23            | -0.82 – 0.37 | 0.454    |
| Biphasic histology      | -0.45            | -1.17 – 0.26 | 0.208    |
| Unknown/other histology | 0.04             | -0.57 – 0.64 | 0.909    |
| Sarcomatoid histology   | -0.2             | -0.80 – 0.39 | 0.494    |
| EPP                     | 1.78             | 0.96 – 2.60  | <0.001   |
| Radiation therapy       | 0.49             | 0.04 – 0.95  | 0.035    |
| Chemotherapy            | -0.03            | -0.54 – 0.48 | 0.9      |

$R^2$  /  $R^2$  adjusted      0.317 / 0.204

ECOG: Eastern Cooperative Oncology Group; EPP = extra-pleural pneumonectomy
